# Supplementary material for: Controlling the radical-induced redox chemistry inside a liquid-cell TEM
Source: Royal Society of Chemistry journal article supplement (doi:10.1039/c9sc02227a), 2019-01-01
Supplement: c9sc02227a1.pdf [file c9sc02227a1.pdf]

Received 00th January 20xx,  
Accepted 00th January 20xx

DOI: 10.1039/x0xx00000x

## Supporting information:

### Controlling the Radical-Induced Redox Chemistry Inside a Liquid-Cell TEM

Bojan Ambrožič<sup>a,b</sup>, Anže Prašnikar<sup>b,c</sup>, Nejc Hodnik<sup>c</sup>, Nina

Kostevšek<sup>a</sup>, Blaž Likozar<sup>c</sup>, Kristina Žužek Rožman<sup>a</sup>, Sašo

Šturm<sup>a</sup>

#### 1. DESCRIPTION OF THE KINETIC RADICAL-INDUCED REDOX MODEL FOR GOLD

##### 1.1 General model description of water radiolysis:

The  $O^{\bullet-}$ ,  $O_3$ ,  $HO_3^{\bullet}$ ,  $O_3^{\bullet-}$  species were not included in the model due to the lack of any corresponding kinetic data at higher temperatures. These species are predominantly formed in basic solutions. This is due to the deprotonation of the hydroxyl radical ( $OH^{\bullet}$ ) into  $O^{\bullet-}$  ( $pK_a \approx 11^1$ ) and  $H_2O_2$  into  $HO_2^{\bullet}$  ( $pK_a \approx 11^1$ ). The presence of the oxygen anion and the hydroperoxyl anion is responsible for the formation of the ozone anion and subsequently other ozonide species.<sup>1</sup> To justify the model's simplification, we calculated the ratio between the sum of the equilibrium concentrations of  $O^{\bullet-}$ ,  $O_3$ ,  $HO_3^{\bullet}$ ,  $O_3^{\bullet-}$  and the equilibrium concentrations of the  $OH^{\bullet}$  radical, using the correlations for equilibrium concentrations in a homogenous solution<sup>2</sup> at an initial  $pH$  7 and 20 °C (Fig. S1). At  $10^{10}$  Gy/s (upper limit of the power-law model) the ratio is 0.012; therefore, there are approximately 80-times more  $OH^{\bullet}$  radicals than other strong oxidizing species. Due to the lower deprotonation rate at lower  $pH$ , the ratio of these concentrations is even lower, leaving the  $OH^{\bullet}$  radical as the main strong oxidizing agent.

<sup>a</sup> Jožef Stefan Institute, Department for Nanostructured Materials, Jamova 39, Ljubljana, Slovenia.

<sup>b</sup> Jožef Stefan International Postgraduate School, Jamova 39, Ljubljana, Slovenia.

<sup>c</sup> National Institute of Chemistry, Department of Catalysis and Chemical Reaction Engineering, Hajdrihova 19, Ljubljana, Slovenia.

† Footnotes relating to the title and/or authors should appear here.

Electronic Supplementary Information (ESI) available: [details of any supplementary information available should be included here]. See DOI: 10.1039/x0xx00000x

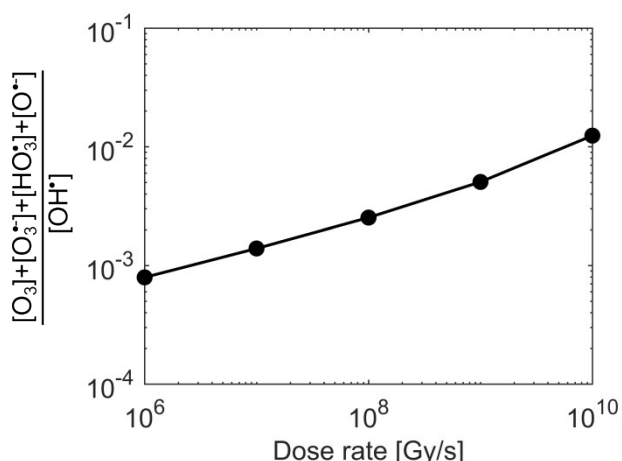

**Figure S1.** Validity of the simplification of the reaction scheme: the dose-rate dependence of the ratio of the equilibrium concentration between  $O^{\bullet-}$ ,  $O_3$ ,  $HO_3$ ,  $O_3^{\bullet-}$  and  $OH^{\bullet}$  radicals at an initial  $pH = 7$  and  $20\text{ }^{\circ}\text{C}$ .

According to the Arrhenius plots in Elliot *et al.*<sup>1</sup>, all the reaction-rate constants linearly follow the relation  $\ln(k) \propto T^{-1}$  below  $100\text{ }^{\circ}\text{C}$ . Therefore, the temperature dependence is written in the form of activation energies and pre-exponential factors (Table S1). Processes in the irradiated matter can be described by a mass-balance equation with the reaction parts and the radiolysis primary yields:

$$\frac{dc_i}{dt} = - \sum_j k_{ij} c_i c_j + \sum_{j,k \neq i} k_{jk} c_j c_k + R_i \quad (S1)$$

where  $c_i$  represents the concentrations of the individual species,  $k_{ij}$  represents the reaction-rate constant and  $R_i$  represent the radiolytic yield. The first part of the right-hand side of the equation describes the consumption rate of the  $i$  compound, while the second part describes the formation of the  $i$  compound. The radiolytic yield  $R_i$  (Eq. S2) is the formation or consumption rate of the  $i$  compound by radiolysis.

$$R_i = \frac{\rho \psi G_i}{F} \left[ \frac{M}{s} \right] \quad (S2)$$

In the above Eq. S2,  $\rho$  represents the solvent density,  $F$  is the Faraday constant,  $\psi$  is the dose rate of the radiation and  $G_i$  is a G value, which represents the primary yield of the  $i$  compound in the first  $\mu\text{s}$  from the start of the radiation. This value is given as the number of molecules created or destroyed per 100 eV of energy deposited. The G values depend on the type of radiation, the media exposed to the radiation and the temperature. They are given in Table S2. The temperature dependence of the G values is calculated using linear interpolation. The dose rate  $\psi$  is calculated from Eq. S3.

$$\psi = \frac{S 10^5 I}{\pi a^2} \left[ \frac{\text{Gy}}{s} \right] \quad (S3)$$

where  $S$  [MeV  $\text{cm}^2/\text{g}$  electron] is the density-normalized, stopping power in the medium,  $I$  is the beam current and  $a$  is the beam radius.

**Table S1.** Reaction-rate constants for the temperature range between  $20\text{ }^{\circ}\text{C}$  and  $100\text{ }^{\circ}\text{C}$ <sup>1</sup>

| reagents                                                          | products                                | A [*]                 | $E_A$ [kJ mol <sup>-1</sup> K <sup>-1</sup> ] |
|-------------------------------------------------------------------|-----------------------------------------|-----------------------|-----------------------------------------------|
| $H^{\bullet} + OH^{\bullet}$                                      | $H_2O_2$                                | $1.88 \times 10^{13}$ | 12.62                                         |
| $H_2O$                                                            | $H^{\bullet} + OH^{\bullet}$            | $1.70 \times 10^6$    | 62.37                                         |
| $H_2O_2$                                                          | $H^{\bullet} + HO_2^{\bullet}$          | $4.12 \times 10^6$    | 43.77                                         |
| $H^{\bullet} + HO_2^{\bullet}$                                    | $H_2O_2$                                | $5.59 \times 10^{12}$ | 11.73                                         |
| $H_2O_2 + OH^{\bullet}$                                           | $HO_2^{\bullet} + H_2O$                 | $3.66 \times 10^{12}$ | 13.98                                         |
| $HO_2^{\bullet} + H_2O$                                           | $H_2O_2 + OH^{\bullet}$                 | $4.54 \times 10^{11}$ | 31.74                                         |
| $e_{\text{aq}}^{\bullet} + H_2O$                                  | $H^{\bullet} + OH^{\bullet}$            | $5.58 \times 10^6$    | 31.73                                         |
| $H^{\bullet} + OH^{\bullet}$                                      | $e_{\text{aq}}^{\bullet} + H_2O$        | $8.52 \times 10^{13}$ | 37.36                                         |
| $H^{\bullet}$                                                     | $H^{\bullet} + e_{\text{aq}}^{\bullet}$ | $2.84 \times 10^{12}$ | 66.66                                         |
| $H^{\bullet} + e_{\text{aq}}^{\bullet}$                           | $H^{\bullet}$                           | $1.98 \times 10^{12}$ | 11.17                                         |
| $HO_2^{\bullet}$                                                  | $O_2^{\bullet-} + H^{\bullet}$          | $2.63 \times 10^8$    | 14.58                                         |
| $O_2^{\bullet-} + H^{\bullet}$                                    | $HO_2^{\bullet}$                        | $5.59 \times 10^{12}$ | 11.73                                         |
| $HO_2^{\bullet} + OH^{\bullet}$                                   | $O_2^{\bullet-} + H_2O$                 | $7.13 \times 10^9$    | 60.93                                         |
| $O_2^{\bullet-} + H_2O$                                           | $HO_2^{\bullet} + OH^{\bullet}$         | $3.66 \times 10^{12}$ | 13.98                                         |
| $e_{\text{aq}}^{\bullet} + OH^{\bullet}$                          | $OH^{\bullet}$                          | $2.64 \times 10^{12}$ | 10.65                                         |
| $e_{\text{aq}}^{\bullet} + H_2O_2$                                | $OH^{\bullet} + OH^{\bullet}$           | $7.75 \times 10^{12}$ | 15.72                                         |
| $e_{\text{aq}}^{\bullet} + H_2O + O_2^{\bullet-}$                 | $HO_2^{\bullet} + OH^{\bullet}$         | $4.43 \times 10^{10}$ | 12.98                                         |
| $e_{\text{aq}}^{\bullet} + HO_2^{\bullet}$                        | $HO_2^{\bullet}$                        | $2.45 \times 10^{12}$ | 12.98                                         |
| $e_{\text{aq}}^{\bullet} + O_2$                                   | $O_2^{\bullet-}$                        | $2.53 \times 10^{12}$ | 11.66                                         |
| $e_{\text{aq}}^{\bullet} + e_{\text{aq}}^{\bullet} + H_2O + H_2O$ | $H_2 + OH^{\bullet} + OH^{\bullet}$     | $1.01 \times 10^{10}$ | 20.74                                         |
| $e_{\text{aq}}^{\bullet} + H^{\bullet} + H_2O$                    | $H_2 + OH^{\bullet}$                    | $2.06 \times 10^{11}$ | 14.93                                         |
| $H^{\bullet} + H_2O$                                              | $H_2 + OH^{\bullet}$                    | $7.39 \times 10^{12}$ | 98.24                                         |
| $H^{\bullet} + H^{\bullet}$                                       | $H_2$                                   | $2.69 \times 10^{12}$ | 15.51                                         |
| $H^{\bullet} + OH^{\bullet}$                                      | $H_2O$                                  | $4.19 \times 10^{11}$ | 9.03                                          |
| $H^{\bullet} + H_2O_2$                                            | $OH^{\bullet} + H_2O$                   | $1.76 \times 10^{11}$ | 21.01                                         |
| $H^{\bullet} + O_2$                                               | $HO_2^{\bullet}$                        | $9.01 \times 10^{11}$ | 10.52                                         |
| $H^{\bullet} + HO_2^{\bullet}$                                    | $H_2O_2$                                | $5.05 \times 10^{12}$ | 15.09                                         |
| $H^{\bullet} + O_2^{\bullet-}$                                    | $HO_2^{\bullet}$                        | $5.05 \times 10^{12}$ | 15.09                                         |
| $OH^{\bullet} + OH^{\bullet}$                                     | $H_2O_2$                                | $9.78 \times 10^{10}$ | 7.48                                          |
| $OH^{\bullet} + HO_2^{\bullet}$                                   | $O_2 + H_2O$                            | $1.31 \times 10^{11}$ | 6.68                                          |
| $OH^{\bullet} + O_2^{\bullet-}$                                   | $OH^{\bullet} + O_2$                    | $8.75 \times 10^{11}$ | 10.84                                         |
| $H_2 + OH^{\bullet}$                                              | $H^{\bullet} + H_2O$                    | $6.55 \times 10^{10}$ | 18.45                                         |
| $OH^{\bullet} + H_2O_2$                                           | $HO_2^{\bullet} + H_2O$                 | $7.72 \times 10^9$    | 13.82                                         |
| $OH^{\bullet} + HO_2^{\bullet}$                                   | $HO_2^{\bullet} + OH^{\bullet}$         | $1.00 \times 10^{12}$ | 11.92                                         |
| $HO_2^{\bullet} + O_2^{\bullet-}$                                 | $HO_2^{\bullet} + O_2$                  | $2.62 \times 10^9$    | 8.09                                          |
| $HO_2^{\bullet} + HO_2^{\bullet}$                                 | $O_2 + H_2O_2$                          | $2.77 \times 10^9$    | 20.07                                         |

\*for the reactions with one molecule the unit is [ $\text{s}^{-1}$ ], for two molecules [ $\text{M}^{-1}\text{s}^{-1}$ ], for three molecules [ $\text{M}^{-2}\text{s}^{-1}$ ] and for four molecules [ $\text{M}^{-3}\text{s}^{-1}$ ]. We used 55.56 M as the molar concentration of water.

**Table S2.** Primary yields, G values, for the temperature range between 20 °C and 100 °C

| species                       | $G_{i-20\text{ }^\circ\text{C}}$<br>[N <sub>i</sub> /100eV] | $G_{i-100\text{ }^\circ\text{C}}$<br>[N <sub>i</sub> /100eV] | Source |
|-------------------------------|-------------------------------------------------------------|--------------------------------------------------------------|--------|
| e <sup>-</sup> <sub>aq</sub>  | 2.73                                                        | 3.10                                                         | 1      |
| H <sup>+</sup>                | 3.19                                                        | 3.61                                                         | a      |
| OH <sup>-</sup>               | 0.46                                                        | 0.51                                                         | a      |
| H <sub>2</sub> O <sub>2</sub> | 0.72                                                        | 0.59                                                         | 1      |
| H <sup>•</sup>                | 0.60                                                        | 0.71                                                         | 1      |
| OH <sup>•</sup>               | 2.75                                                        | 3.57                                                         | 1      |
| H <sub>2</sub>                | 0.43                                                        | 0.47                                                         | 1      |
| H <sub>2</sub> O              | -4.65                                                       | -5.26                                                        | b      |

<sup>a</sup> H<sup>+</sup> primary yield is calculated using the ratio between  $G(H^+)$  and  $G(e^-_{aq})$  obtained from experimental measurements<sup>3,4</sup> that are summed in the work of Hill and Smith<sup>5</sup>. Using this ratio the charge-balance yield  $G(OH^-)$  to 0.46 at 25 °C and 0.51 at 100 °C, which is a similar value to  $G(OH^-) = 0.50$  for low LET radiation.<sup>6</sup>

<sup>b</sup> Mass-balance calculation.

**Temporal pressure increase:** A dynamic pressure increase due to radiolysis was estimated by assuming the already-formed gas bubble, composed of H<sub>2</sub> and O<sub>2</sub> gas, exposed specimen area using an electron beam with a diameter of 1 μm and the overall liquid-layer thickness of 100 nm. A constant 10-time cell volume expansion was assumed due to the gas formation, which is in accordance with the prediction of Park et al.<sup>7</sup> Figure S2 below shows an estimated dynamic pressure increase.

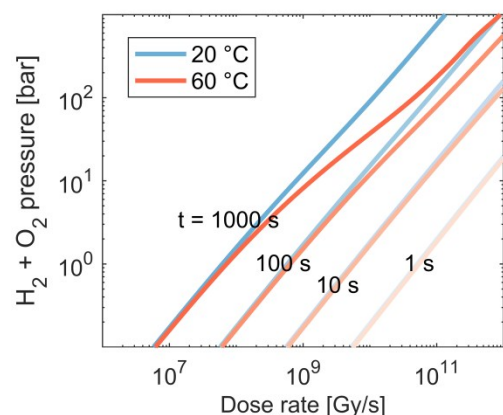**Figure S2.** The effect of dynamic pressure increase at different dose rates as a function of time for two limiting temperatures, 20°C and 60°C.

### 1.2 The interaction between the radiolysis products and the gold species in the liquid-cell transmission electron microscopy (LCTEM) system:

**Influence of chloride ions:** The chloride is an OH<sup>•</sup> scavenger. The main reaction product due to the presence of chloride is ClOH<sup>•+</sup>,<sup>8</sup>

which is also a very strong oxidizer ( $E_0(\text{ClOH}^+ / (\text{Cl}^- + \text{OH}^+)) = 1.91 \text{ V}_{\text{SHE}}^9$ ) and can also oxidize Au particles. Due to the large difference in the standard electrochemical potentials between ClOH<sup>•+</sup> and Au<sup>0</sup>, it is assumed that the rate of Au oxidation with OH<sup>•</sup> and ClOH<sup>•+</sup> is similar, which is approximated to a negligible influence on the trends of the Au oxidation state. However, for an accurate assessment of the chloride's influence, all the significant reactions with the chloride species should be added.

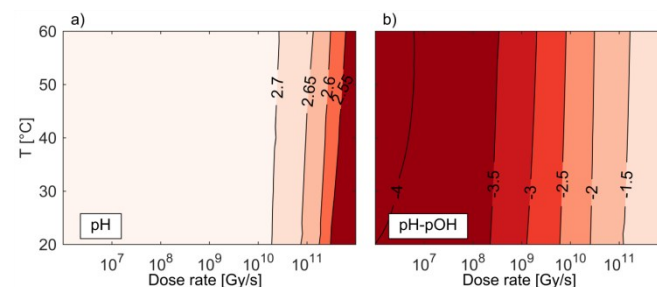**Figure S3.** a) Equilibrium pH of the solution containing Au species. b) Equilibrium difference between pH and pOH. Initial pH = 2.8, maximum pressure 1 bar.

**Calculation of pH and pOH:** The Au ions can form hydroxide species and other aureate species at higher values of pH (>7) and at high redox potentials.<sup>10</sup> In order to evaluate the most stable gold species for the set experimental conditions the values of pH (Figure S3a) and pH-pOH (Figure S3b) were calculated. The graph indicates that the pH is stable at the initial pH value of 2.8 for the broad range of dose rates from 10<sup>6</sup> up to 10<sup>10</sup> Gy/s. Above the indicated dose rate the pH value decreases from 2.7 to 2.55, when the dose rate is increased from 10<sup>10</sup> to 10<sup>12</sup> Gy/s, respectively. Relative to the dose rate, it was concluded that the pH variations are not significantly influenced by a change of the temperature in the liquid-cell TEM. However, to determine the chemical state of the gold species the OH<sup>-</sup> concentration is also important. The difference pH-pOH is equal to  $\log_{10}([\text{OH}^-]/[\text{H}^+])$  and ranges between -4 and -1, mainly influenced by the changes in the dose rates. Due to the relatively low pH value (2.7-2.6) and the pH-pOH value between -4 and -1 (a more acidic solution) at all dose rates and temperatures, this study confirms that the dissolved Au species are in the form [AuCl<sub>2</sub>].

**Table S3.** Reaction-rate constants of the radiolysis products with gold species

| Au spec.        | Radiolysis spec.              | $k_{20^\circ\text{C}}$<br>[M <sup>-1</sup> s <sup>-1</sup> ] | Source | $E_A$<br>[kJ/mol]   | Source | $A_{\text{calculated}}$ |
|-----------------|-------------------------------|--------------------------------------------------------------|--------|---------------------|--------|-------------------------|
| Au <sup>+</sup> | e <sup>-</sup> <sub>aq</sub>  | $8.0 \times 10^9$                                            | 11     | 12.98 <sup>b</sup>  |        | $1.64 \times 10^{12}$   |
|                 | H <sup>•</sup>                | $8.0 \times 10^9$ <sup>a</sup>                               | 11     | 15.09 <sup>c</sup>  |        | $3.91 \times 10^{12}$   |
|                 | H <sub>2</sub> O <sub>2</sub> | 0 <sup>j</sup>                                               | 12     | /                   | 12     | 0                       |
|                 | HO <sub>2</sub> <sup>-</sup>  | 1.89 <sup>d</sup>                                            | 12     | 25.8 <sup>d,e</sup> | 12     | $7.46 \times 10^4$      |
|                 | H <sub>2</sub>                | $7.4 \times 10^{-3}$ <sup>d,f</sup>                          | 13     | 94.1 <sup>d,g</sup> | 14     | $4.28 \times 10^{14}$   |
|                 | HO <sub>2</sub> <sup>•</sup>  | 1.89 <sup>d,h</sup>                                          |        | 25.8 <sup>d,h</sup> |        | $7.46 \times 10^4$      |
| Au <sup>0</sup> | O <sub>2</sub> <sup>-</sup>   | 1.89 <sup>d,h</sup>                                          |        | 25.8 <sup>d,h</sup> |        | $7.46 \times 10^4$      |
|                 | OH <sup>•</sup>               | $1.83 \times 10^{9i}$                                        |        | 13.0 <sup>i</sup>   |        | $3.80 \times 10^{11}$   |

<sup>a</sup> Assumed the same  $k_{20}$  °C, as for the reaction between  $e_{\text{aq}}^-$  and  $\text{Au}^+$ , because the reaction rate constants of  $\text{Au}^{3+} + \text{H}^+ / e_{\text{aq}}^- \rightarrow \text{Au}^{2+} + \text{H}^+ / \text{H}_2\text{O}$  are similar ( $(5.7 \pm 1.5) \times 10^9 \text{ M}^{-1}\text{s}^{-1}$ ).

<sup>b</sup>  $E_A$  assumed the same as for the reaction  $e_{\text{aq}}^- + \text{O}_2^* (+ \text{H}_2\text{O}) \rightarrow \text{HO}_2^- + \text{OH}^-$ , because both reactions are diffusion controlled and  $\text{O}_2^*$  as the  $[\text{AuCl}_2]^-$  negatively charged.

<sup>c</sup>  $E_A$  assumed the same as for the reaction  $\text{H}^+ + \text{O}_2^* \rightarrow \text{HO}_2^-$ , because both reactions are diffusion controlled and  $\text{O}_2^*$  is as the  $[\text{AuCl}_2]^-$  negatively charged.

<sup>d</sup> Rate for the presence of a gold catalyst, as given in the literature.

<sup>e</sup>  $E_A$  from the overall observed constant is used (apparent activation energy).<sup>12</sup>

<sup>f</sup> Rate expression  $k[\text{Au}^0][\text{H}_2]$ , at  $\text{pH} = 7$ .<sup>13</sup>

<sup>g</sup>  $E_A$  assumed for the  $\text{H}_2$  dissociation on Au (211)<sup>14</sup>, since is the dissociation step.

<sup>h</sup> Assumed the same rate and activation energy as for the reaction  $\text{HO}_2^- + \text{Au}^+ \rightarrow \text{HO}_2^* + \text{Au}^0$ .  $\text{HO}_2^*$  and  $\text{O}_2^*$  are thermodynamically much stronger reducing agents ( $E_{\text{NERNST}} = -0.27$  and  $0.05$  respectively (Table 1)) than  $\text{HO}_2^-$  ( $E_{\text{NERNST}} = 0.65$  (Table 1)). However, in the DFT study on Au (111)<sup>15</sup> they show, that the reaction  $\text{H}_2\text{O}_2^* \rightarrow \text{HO}_2^* + \text{H}^*$  has a lower activation energy ( $E_A = 113 \text{ kJ/mol}$ ,  $\Delta E = 106 \text{ kJ/mol}$ ) than the reaction  $\text{HO}_2^* \rightarrow \text{O}_2^* + \text{H}^*$  ( $E_A = 141 \text{ kJ/mol}$ ,  $\Delta E = 85 \text{ kJ/mol}$ ). Also, it is found that at higher  $\text{pH}$  (10–13) the reduction of  $\text{HAuCl}_4$  with  $\text{H}_2\text{O}_2$  is more significant and much faster than at neutral  $\text{pH}$  (7–8).<sup>12</sup> This can be due to a larger amount of  $\text{HO}_2^-$  and  $\text{O}_2^*$ . The electron-transfer reactions are generally fast and it is expected that  $\text{O}_2^*$  will reduce the Au species with a rate similar to  $\text{H}^*$  or  $e_{\text{aq}}^-$ . However, in the case of low  $\text{pH}$ ,  $\text{O}_2^*$  is protonated to  $\text{HO}_2^*$ , which needs to be broken on the Au surface to form  $\text{O}_2$  and  $\text{H}^*$ , and this is a much slower process, as seen from the DFT calculations.<sup>15</sup> Because of the lack of experimental data on the kinetics of  $\text{HO}_2^*$  and  $\text{O}_2^*$  with  $\text{Au}^+$  we assume the same rate as for the case of the reaction of  $\text{HO}_2^-$  with  $\text{Au}^+$ . However, for the experiments at high  $\text{pH}$ , where the amount of  $\text{HO}_2^-$  and  $\text{O}_2^*$  is significant, corrected reaction rates should be used.

<sup>i</sup> Assumed the same rate coefficient as for the reaction of  $\text{Au}^+ + \text{OH}^- \rightarrow \text{Au}^0 + \text{OH}^-$ . The rates of dissolution of  $\text{Au}^0$  with a strong oxidizing or complexing agent without stirring are usually diffusion controlled.<sup>16</sup> Because of zero stirring, the reaction is diffusion controlled. For the case of the dissolution of Au in a cyanide solution the activation energies are 12–21 kJ/mol.<sup>16</sup> The temperature dependence of the diffusivity constant for water self-diffusion, which is similar to the  $\text{OH}^-$  diffusion constant, is used to calculate the activation energy.<sup>1</sup>

<sup>j</sup> The value is 0 because the mechanism of Au ion reduction proceeds through  $\text{HO}_2^-$ .<sup>12</sup> In the kinetic model we have already included the reversible reaction between  $\text{H}_2\text{O}_2$  and  $\text{HO}_2^-$ , and therefore the contribution to the reduction of the  $\text{H}_2\text{O}_2$  is 0.

### 1.3 Explanation of redox trends due to temperature change:

The influence of the temperature on  $[\text{Au}^0]/[\text{Au}^+]$  increases with increasing pressure (Figure 3), which points to the influence of the  $\text{H}_2$  and  $\text{O}_2$  solubility in the liquid phase. The temperature dependence of

the  $\text{O}_2$  solubility is significantly higher when compared with the solubility of  $\text{H}_2$  in water (Table S4).

**Table S4.** Solubility of the  $\text{H}_2$  and  $\text{O}_2$  gases in water.

| T     | $\frac{1}{K_H} \Big _{\text{O}_2} \left[ \frac{\text{mol}}{\text{L bar}} \right]$ | $\frac{1}{K_H} \Big _{\text{H}_2} \left[ \frac{\text{mol}}{\text{L bar}} \right]$ |
|-------|-----------------------------------------------------------------------------------|-----------------------------------------------------------------------------------|
| 20 °C | $1.40 \times 10^{-3}$                                                             | $8.08 \times 10^{-4}$                                                             |
| 60 °C | $0.88 \times 10^{-3}$<br>(decrease by 37% relative to 20 °C)                      | $7.28 \times 10^{-4}$<br>(decrease by 9.9% relative to 20 °C)                     |

To prove the impact of the solubility's temperature dependence we performed a sensitivity analysis for the temperature-dependent part of the solubility relation (of both gases at the same time). We calculated the Au redox ratios for the different *factor* values: 0.5, 1 and 2.

$$H_i(T(K)) = \exp\left(-A + \frac{B}{\text{factor}(T - 293.15 \text{ K}) + 293}\right) \quad (\text{S4})$$

**Table S5.** Parameters of the temperature-dependent Henry constant.<sup>17,18</sup>

| Coef. | $\text{H}_2$ | $\text{O}_2$ |
|-------|--------------|--------------|
| A     | 48.1611      | 66.7354      |
| B     | 5528.45      | 8747.55      |
| C     | 16.8893      | 24.4526      |

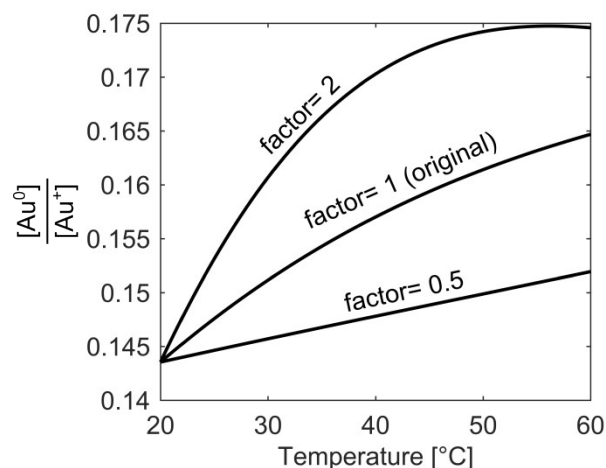

**Figure S4.** Temperature dependence of the Au redox ratio at different sensitivity factors of the  $\text{H}_2$  and  $\text{O}_2$  solubilities. Dose rate  $10^9 \text{ Gy/s}$ , total concentration of gold species is  $1.5 \text{ mM}$  with an initial  $\text{pH} 2.8$ , and pressure  $5 \text{ bar}$ .

From Figure S4 we can see that the temperature dependence of the solubility influences the Au redox ratio. When we increase the temperature dependence of the gases' solubility (*factor* = 2) the

redox ratio increases faster with temperature, and when we decrease the temperature dependence of the gases' solubility ( $factor = 0.5$ ) the redox ratio increases more slowly. The concentration of  $O_2$  in the liquid phase decreases much faster than the concentration of  $H_2$ . Because  $H_2$  is a strong  $OH^\bullet$  radical scavenger ( $k_{20} = 3.4 \times 10^7 M^{-1}s^{-1}$ ) and  $O_2$  is a strong scavenger of  $H^\bullet$  and  $e_{aq}^-$  ( $k_{20} = 1.2 \times 10^{10}, 2.1 \times 10^{10} M^{-1}s^{-1}$ , respectively), the ratio  $\frac{[OH^\bullet]}{[H^\bullet]}$  (consequently Au redox ratio), depends on the concentrations of  $O_2$  and  $H_2$ .

## 2. MODEL VERIFICATION BY LOW-DOSE EXPERIMENTS USING $\gamma$ RADIATION

The conditions used for our model verification were collected from several sources<sup>6,19,20</sup> for the bulk water radiolysis in solutions of  $H_2O_2$ ,  $O_2$ , and  $H_2$  by using  $\gamma$  rays as a source of radiation, which is similar to electron radiation low-LET (linear energy transfer). The experiments were performed at different dose rates and solute concentrations.

**Table S6.** Detailed conditions of the radiolysis model's verification.

| source                             | Fi g. | Li ne | Dose rate [Gy /s] | $T$ [°C] | $c_{init}$ [M] |          |                       |                       |                       |
|------------------------------------|-------|-------|-------------------|----------|----------------|----------|-----------------------|-----------------------|-----------------------|
|                                    |       |       |                   |          | $pH_{init}$    | $H_2O_2$ | $O_2$                 | $H_2$                 |                       |
| Pastina, LaVerne 2001 <sup>6</sup> | 4     | a     | 1                 | 0.250    | 25             | 7        | $4.88 \times 10^{-5}$ | 0                     | 0                     |
|                                    |       |       | 2                 | 0.250    | 25             | 7        | $4.88 \times 10^{-3}$ | 0                     | $8.00 \times 10^{-6}$ |
|                                    |       |       | 3                 | 0.250    | 25             | 7        | $4.88 \times 10^{-5}$ | 0                     | $8.00 \times 10^{-5}$ |
|                                    |       |       | 4                 | 0.250    | 25             | 7        | $4.88 \times 10^{-5}$ | 0                     | $8.00 \times 10^{-4}$ |
| Hayon 1964 <sup>19</sup>           | 4     | b     | 1                 | 0.205    | 25             | 7        | $1.20 \times 10^{-3}$ | 0                     | 0                     |
|                                    |       |       | 2                 | 0.205    | 25             | 7        | $7.57 \times 10^{-4}$ | 0                     | 0                     |
|                                    |       |       | 3                 | 0.205    | 25             | 7        | $5.35 \times 10^{-4}$ | 0                     | 0                     |
|                                    |       |       | 4                 | 0.205    | 25             | 7        | $3.20 \times 10^{-4}$ | 0                     | 0                     |
|                                    |       |       | 4                 | 0.205    | 25             | 7        | $1.39 \times 10^{-4}$ | 0                     | 0                     |
| Hochandel 1952 <sup>20</sup>       | 4     | c     | 1                 | 0.653    | 25             | 7        | 0                     | $3.32 \times 10^{-4}$ | $4.90 \times 10^{-4}$ |
|                                    |       |       | 2                 | 0.653    | 25             | 7        | 0                     | $7.50 \times 10^{-5}$ | $7.31 \times 10^{-4}$ |
|                                    |       |       | 3                 | 0.653    | 25             | 7        | 0                     | $1.25 \times 10^{-3}$ | 0                     |

## 3. MODEL VERIFICATION BASED ON Au PRECIPITATION/DISSOLUTION LCTEM EXPERIMENTS

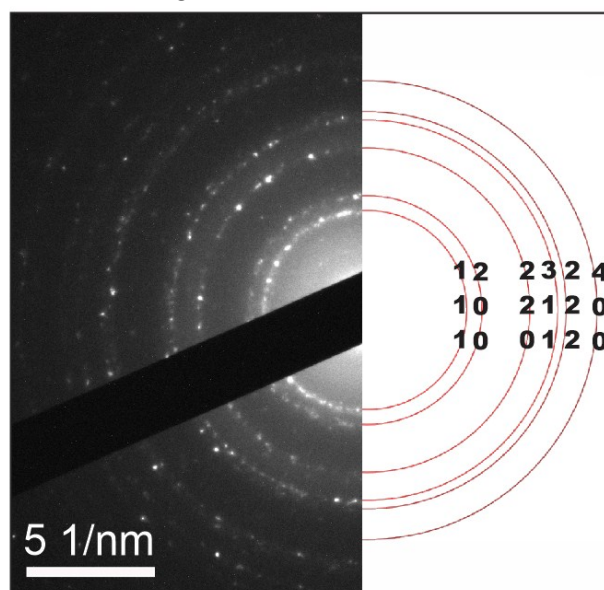

**Figure S5.** Ex-situ SAED analysis of NPs formed during in-situ LCTEM experiment, indicating the FCC structure of gold.

## 4. GRAPHICAL ILLUSTRATION OF THE AU PRECIPITATION/DISSOLUTION CONTROLLED BY THE RADICAL-INDUCED REDOX CHEMISTRY INSIDE THE LIQUID-CELL TEM

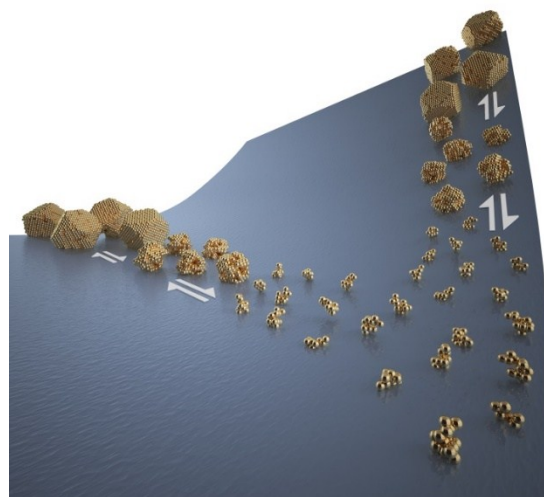

**Figure S6.** Growth and dissolution of Au particles are reversible and can be controlled by different operating conditions in the liquid-cell TEM. The three-dimensional surface represents the value of the equilibrium  $[Au^0]/[Au^+]$  ratio. For example, high-slope regions signify higher gradients in  $[Au^0]/[Au^+]$ , hence the gold's tendency for precipitation. The vertical component is related to the increase of the dose rate, while the horizontal component indicates a temperature increase.

## NOTES AND REFERENCES

- (S1) Elliot, A.J. Bartels, D. M.; Elliot. The Reaction Set, Rate Constants and g-Values for the Simulation of the Radiolysis of Light Water over the Range 20° to 350°C Based on Information Available in 2008; Report AECL No. 153-127160-450-001; Atomic Energy of Canada Ltd.:Mississauga, Ontario, Ca. **2009**.
- (S2) Schneider, N. M.; Norton, M. M.; Mendel, B. J.; Grogan, J. M.; Ross, F. M.; Bau, H. H.; Frances, M.; Bau, H. H. Electron-Water Interactions and Implications for Liquid Cell Electron Microscopy. *J. Phys. Chem. C* **2014**, *118*, 22373–22382.
- (S3) Green, N. J. B.; Pilling, M. J.; Pimblott, S. M.; Clifford, P. Stochastic Modeling of Fast Kinetics in a Radiation Track. *J. Phys. Chem.* **1990**, *94*, 251–258.
- (S4) Anderson, R. F.; Vojnovic, B.; Michael, B. D. The Radiation-Chemical Yields of H<sub>3</sub>O<sup>+</sup> and OH<sup>-</sup> as Determined by Nanosecond Conductimetric Measurements. *Radiat. Phys. Chem.* **1985**, *26*, 301–303.
- (S5) Hill, M. A.; Smith, F. A. Calculation of Initial and Primary Yields in the Radiolysis of Water. *Radiat. Phys. Chem.* **1994**, *43*, 265–280.
- (S6) Pastina, B.; Laverne, J. A. Effect of Molecular Hydrogen on Hydrogen Peroxide in Water Radiolysis. *J. Phys. Chem. A* **2001**, *105*, 9316–9322.
- (S7) Park, J. H.; Schneider, N. M.; Grogan, J. M.; Reuter, M. C.; Bau, H. H.; Kodambaka, S.; Ross, F. M. Control of Electron Beam-Induced Au Nanocrystal Growth Kinetics through Solution Chemistry. *Nano Lett.* **2015**, *15*, 5314–5320.
- (S8) Atinault, E.; De Waele, V.; Schmidhammer, U.; Fattahi, M.; Mostafavi, M. Scavenging of Es<sup>-</sup> and OH<sup>•</sup> Radicals in Concentrated HCl and NaCl Aqueous Solutions. *Chem. Phys. Lett.* **2008**, *460*, 461–465.
- (S9) Armstrong, D. A.; Huie, R. E.; Lyman, S.; Koppenol, W. H.; Merényi, G.; Neta, P.; Ruscic, B.; Stanbury, D. M.; Steenken, S. Standard Electrode Potentials Involving Radicals in Aqueous Solution : Inorganic Radicals (IUPAC Technical Report). *Pure Appl. Chem.* **2015**, *87*, 1139–1150.
- (S10) Kaye, M. H.; Thompson, W. T. Pourbaix Diagrams for Multielement Systems. In *Uhlig's corrosion handbook, Third Edition*; Revie, W. R., Ed.; John Wiley & Sons, Inc.: Hoboken, New Jersey, 2011; pp 103–122.
- (S11) Ghosh Mazumdar, A. S. and Hart, E. J. A Pulse Radiolysis Study of Bivalent and Zerovalent Gold in Aqueous Solutions. In *Radiation Chemistry*; Hart, E. J., Ed.; American Chemical Society, 1968; pp 193–209.
- (S12) Paclawski, K. and Fitzner, K. Kinetics of Reduction of Gold(III) Complexes Using H<sub>2</sub>O<sub>2</sub>. *Metall. Mater. Trans. B* **2006**, *37B*, 703–714.
- (S13) Ershov, B. G.; Abkhalimov, E. V.; Solovov, R. D.; Roldughin, V. I. Gold Nanoparticles in Aqueous Solutions: Influence of Size and PH on Hydrogen Dissociative Adsorption and Au(III) Ion Reduction. *Phys. Chem. Chem. Phys.* **2016**, *18*, 13459–13466.
- (S14) Wang, S.; Petzold, V.; Tripkovic, V.; Kleis, J.; Howalt, J. G.; Skúlason, E.; Fernández, E. M.; Hvolbæk, B.; Jones, G.; Toftelund, A.; Falsig, H.; Björketun, M.; Studt, F.; Abild-Pedersen, F.; J., R.; Nørskov, J. K.; Bligaard, T. Universal Transition State Scaling Relations for (de)Hydrogenation over Transition Metals. *Phys. Chem. Chem. Phys.* **2011**, *13*, 20760–20765.
- (S15) Yang, Y.; Dai, C.; Fisher, A.; Shen, Y. A Full Understanding of Oxygen Reduction Reaction Mechanism on Au(111) Surface. *J. Phys. Condens. Matter* **2017**, *29*, 365201–365208.
- (S16) Habahchi, F. *Kinetics and Mechanism of Gold and Silver Dissolution in Cyanide Solution*; Montana Bureau of Mines Geological Bulletin 59, 1967.
- (S17) Young, C. L. Volume 5/6, Hydrogen and Deuterium. In *IUPAC-NIST Solubility Database*; Pergamon Press: Oxford, U.K., 1981; pp 1–3.
- (S18) Battino, R. Volume 7, Oxygen and Ozone. In *IUPAC-NIST Solubility Database*; Pergamon Press: Oxford, U.K., 1981; pp 1–5.
- (S19) Hayon, E. Radiolysis of Air-Free Aqueous Solutions of Hydrogen Peroxide. *Trans. Faraday Soc.* **1964**, *60*, 1059–1067.
- (S20) Hochanadel, C. J. Effects of Cobalt  $\gamma$ -Radiation on Water and Aqueous Solutions. *J. Phys. Chem.* **1952**, *56*, 587–594.
